# Supplementary material
Source: Springer Nature journal article supplement (https://www.springermedizin.de/resource/supplementary/12967_2013_1546_MOESM8_ESM.pdf/9574316)

**A****Mini-survivin**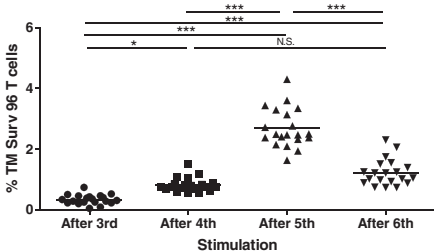**B****Ubi-Mini-survivin**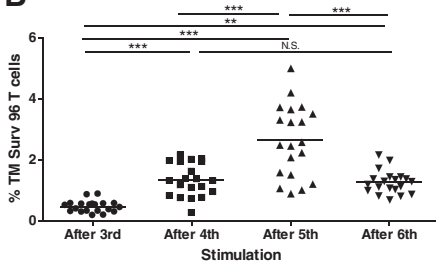

Supplement: MOESM8 [file 9574316]
